# Supplementary material for: Dung beetles as samplers of mammals in Malaysian Borneo—a test of high throughput metabarcoding of iDNA
Source: PeerJ journal article supplement (doi:10.7717/peerj.11897), 2021-08-13

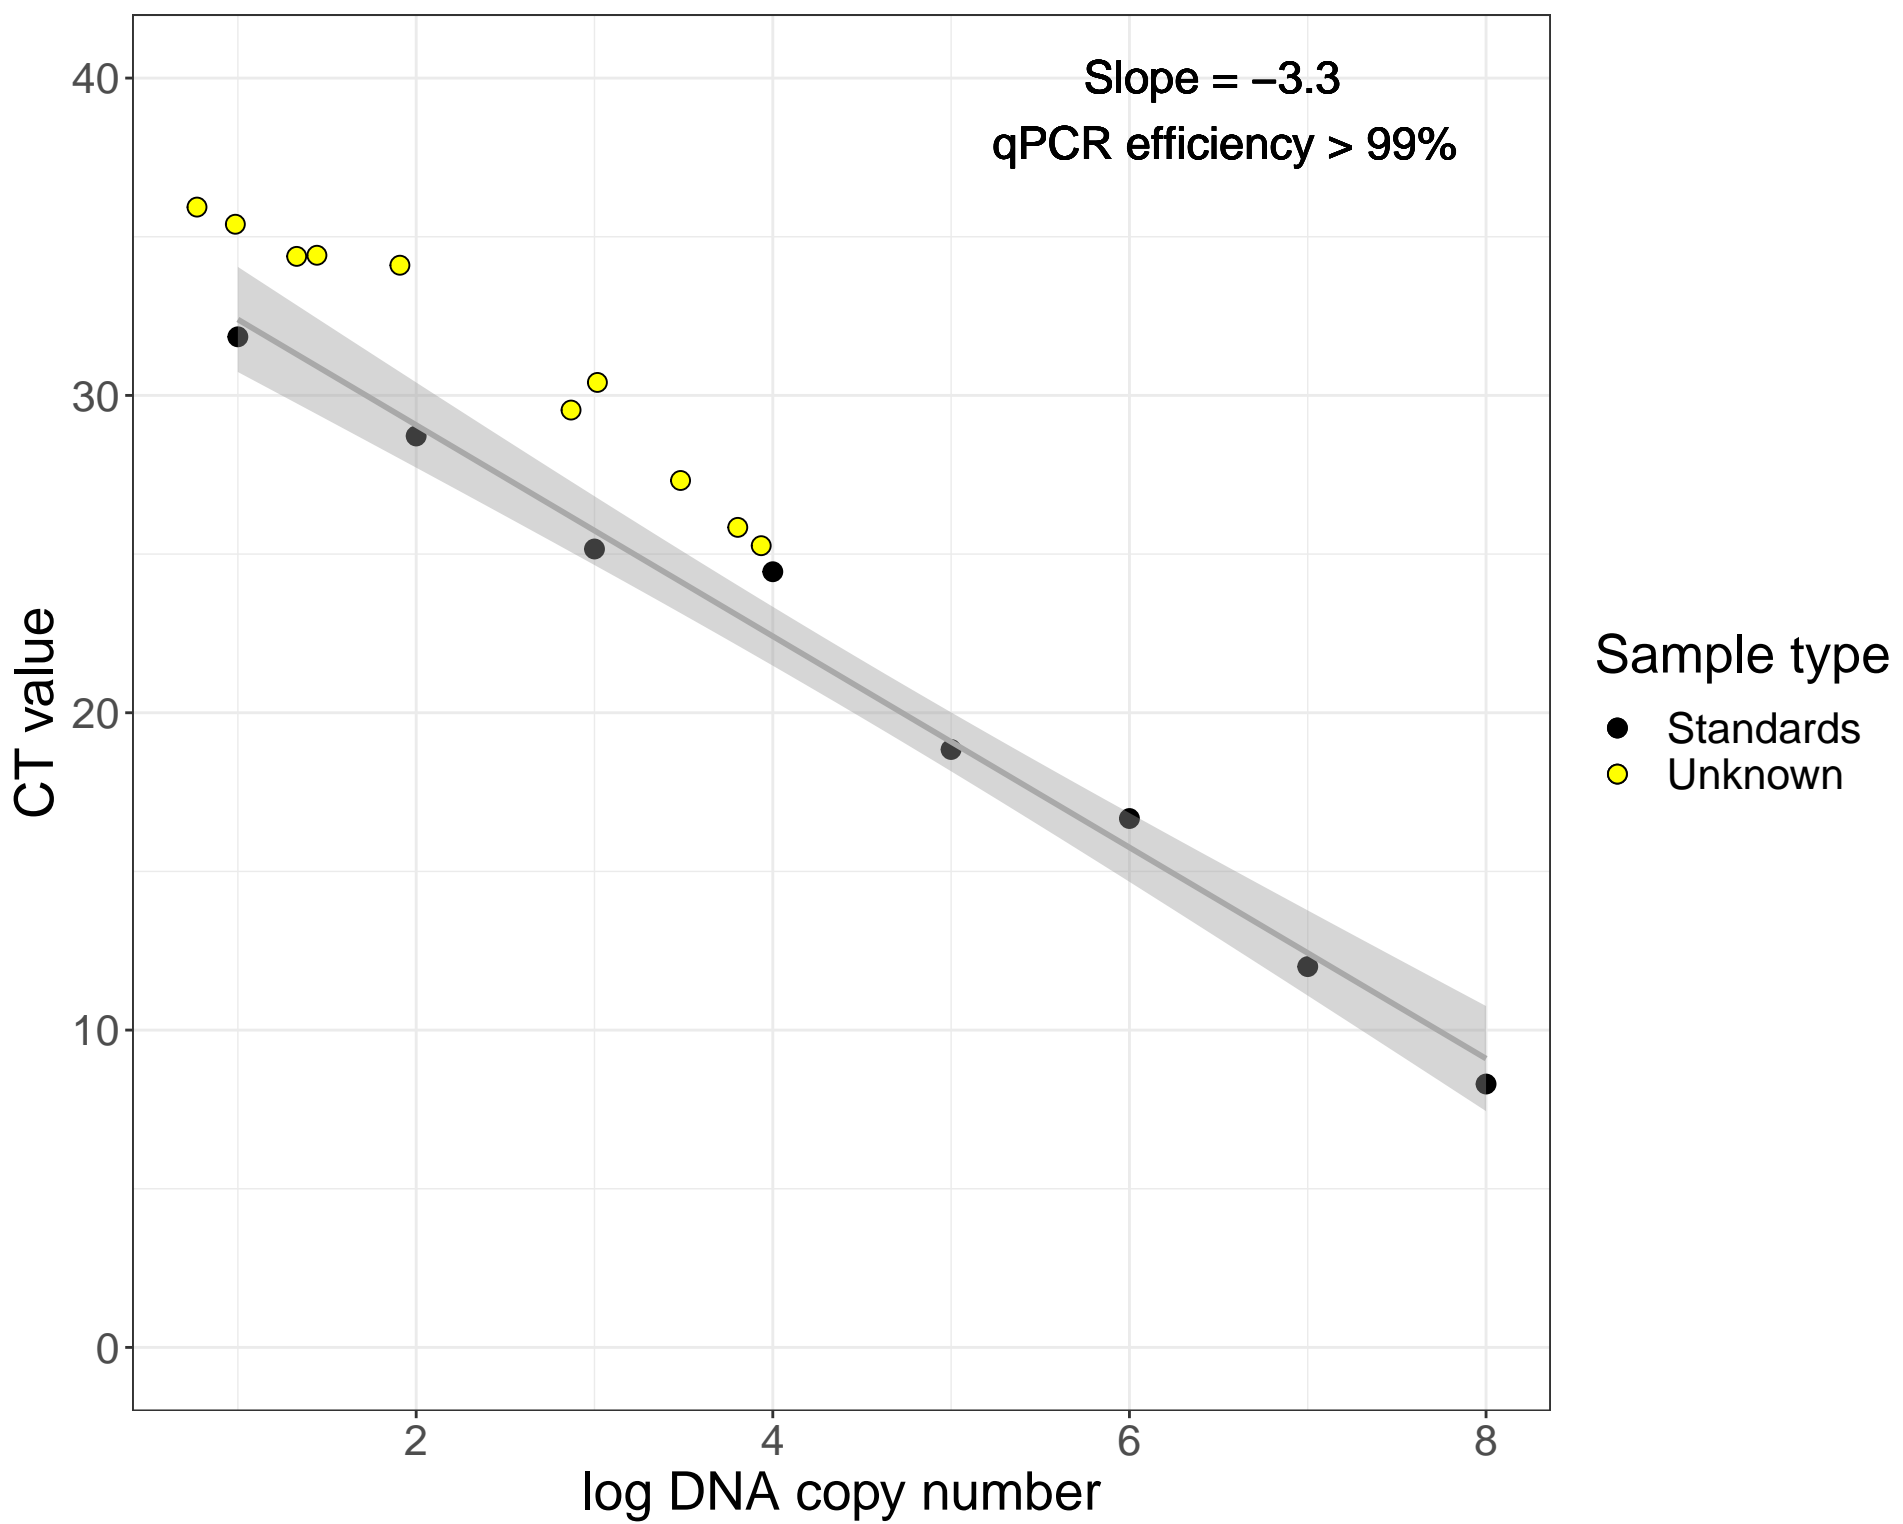

Supplement: FigureS1.StandardCurve.pdf [file FigureS1.StandardCurve.pdf]
