# Supplementary material for: Dung beetles as samplers of mammals in Malaysian Borneo—a test of high throughput metabarcoding of iDNA
Source: PeerJ. 2021 Aug 13;9:e11897. doi: 10.7717/peerj.11897 (PMC8366524; doi:10.7717/peerj.11897)
Supplement: Supplemental Information 3 — Filtered read counts per PCR replicate for each dung beetle sample. Samples were either a pooled extraction of guts, a single gut extraction or trap community (3 extractions from each of the two traps). Read counts are after merging with AdapterRemoval and sorting unique amplicon tags and filtering with the DAMe pipeline. [file peerj-09-11897-s003.xlsx]

## Sheet: SUPP TABLE
Supplementary table 1 Filtered read counts per PCR replicate for each dung beetle sample. Samples were either a pooled extraction of guts, a single gut extraction or trap community (3 extractions from each of the two traps). Read counts are after merging with AdapterRemoval and sorting unique amplicon tags and filtering with the DAMe pipeline.
SAMPLE NAME	SEQ RUN	TYPE	PCR REP 1	PCR REP 2	PCR REP 3	TOTAL
DB1	ONE	Gut pool	5157	6880	1413	13450
DB2	ONE	Gut pool	801	2	1920	2723
WB1	ONE	Gut pool	850	11721	5701	18272
GUT_MIX1	TWO	Gut pool	2409	22763	4029	29201
GUT_IND	TWO	Gut individual	18208	16560	13848	48616
TRAP8_1A	TWO	Community	57721	18283	15277	91281
TRAP8_2	TWO	Community	10941	9359	0	20300
TRAP8_3	TWO	Community	16907	7108	20779	44794
TRAP9_1	TWO	Community	3421	6231	0	9652
TRAP9_2	TWO	Community	34723	8911	0	43634
TRAP9_3	TWO	Community	1526	1010	3023	5559
