# Supplementary material for: Dung beetles as samplers of mammals in Malaysian Borneo—a test of high throughput metabarcoding of iDNA
Source: PeerJ. 2021 Aug 13;9:e11897. doi: 10.7717/peerj.11897 (PMC8366524; doi:10.7717/peerj.11897)
Supplement: Supplemental Information 4 — Two tables (A) OTU by sample matrix and (B) taxonomic assignments with blast scores from LULU. [file peerj-09-11897-s004.xlsx]

## Sheet: REVISION_Supplementary_table2 
Supplementary table 2 - showning (A) OUT by sample matrix and (B) taxonomic assignments with blast scores from LULU
A. OTU by sample matrix, showing the normalised read counts and the taxonomic assignments for each OTU. The sample type is also given
		OTU1	OTU2	OTU4	OTU6	OTU7	OTU8	OTU9
Sample name	Type	Homo sapiens	Sus barbatus	Rusa unicolor	Muntiacus	Tragulus	Hystrix	Hemigalus derbyanus
DB1	Pool	47007	0	0	0	0	0	0
DB2	Pool	50000	0	0	0	0	0	0
WB1	Pool	30861	14289	2763	0	804	1214	0
GUT_MIX2	Pool	50000	0	0	0	0	0	0
GUT_IND	Single	14054	499	0	0	35445	0	0
TRAP8_1A	Trap	50000	0	0	0	0	0	0
TRAP8_1B	Trap	25846	0	20667	0	0	0	20
TRAP8_2	Trap	48787	0	25	0	0	0	0
TRAP8_3	Trap	10181	0	0	0	0	0	0
TRAP9_1	Trap	50000	0	0	0	0	0	0
TRAP9_2	Trap	12389	73	0	36744	653	0	0
TRAP9_3	Trap	49958	0	0	0	0	0	0
B. Output from LULU with the taxonomic assignment
OTU	ORDER	FAMILY	GENUS	SPECIES	TAXA	bit score	e value	identity	sequences	total	spread	parent_id	curated	rank
OTU1	Primates	Hominidae	Homo	Homo sapiens	Homo sapiens	174	0	1	gcagaacccaacctccgagcagtacatgctaagacttcaccagtcaaagcgaactactatactcaattgatccaataacttgaccaacggaaca	5341116	211	OTU1	parent	1
OTU2	Suina	Suidae	Sus	Sus barbatus	Sus barbatus	174	0	1	gtacaaaaaaccctccgagtgattttaatctagacaaaccagtcaaaataaccataacatcacttattgatccaaaattttgatcaacggaaca	3129131	192	OTU2	parent	2
OTU4	Ruminantia	Cervidae	Cervinae	Cervinae	Rusa unicolor	171	1e-45	1	gaacaagaaaacctccgagcgattttaaagactagacctacaagtcgaatcacgcaatcgtttattgatccaaaaaattgatcaacggaaca	431539	66	OTU4	parent	3
OTU6	Ruminantia	Cervidae	Muntiacus	Muntiacus	Muntiacus	159	2e-42	0.91	gaataaaaaatcctccgagcgattttaaagactagacctacaagtcaaatcacataatcgcttattgatccaaaaaaattgatcaacggaaca	254998	24	OTU6	parent	5
OTU7	Ruminantia	Tragulidae	Tragulus	Tragulus napu	Tragulus napu	171	1e-45	0.99	gaataaaaaatcctccgagcgattactaaagactagacctacaagtcaaatcgctacatcgcaaattgatccaaaaacctttgatcaacggaaca	173286	30	OTU7	parent	9
OTU8	Rodentia	Hystricidae	Hystrix	Hystrix	Hystrix	167	1e-44	0.91	gaacaaaaaaacctccgaatgattttaacctagacactacaagtcaaagtcaaaaatcatcaattgacccagtacaaactgatcaacggacca	234026	20	OTU8	parent	6
OTU9	Carnivora	Viverridae	Hemigalus	Hemigalus derbyanus	Hemigalus derbyanus	176	0	1	gtacaaaataacctccgagtgatttaaatcaagacttaccagtcaaaaataatacatcatttattgatccaaaaaataatttgatcaacggaaca	55798	9	OTU9	parent	13
