# Supplementary material for: Dung beetles as samplers of mammals in Malaysian Borneo—a test of high throughput metabarcoding of iDNA
Source: PeerJ. 2021 Aug 13;9:e11897. doi: 10.7717/peerj.11897 (PMC8366524; doi:10.7717/peerj.11897)
Supplement: Supplemental Information 6 [file peerj-09-11897-s006.xlsx]

## Sheet: 16smam_standards
sample	rep	time	sex	ID	weight	length	tag	dilution_factor	plate	well	ct	copy_no
ST1	1	na	na		0	0	58	1	1	G8	32.93	10
ST1	2	na	na		0	0	44	1	1	H8	32.37	10
ST1	1	na	na		0	0	58	1	2	G8	32.62	10
ST1	2	na	na		0	0	44	1	2	H8	30.73	10
ST1	1	na	na		0	0	58	1	3	G8	31.66	10
ST1	2	na	na		0	0	44	1	3	H8	30.77	10
ST2	1	na	na		0	0	51	1	1	G7	29.29	100
ST2	2	na	na		0	0	43	1	1	H7	29.76	100
ST2	1	na	na		0	0	51	1	2	G7	28.16	100
ST2	2	na	na		0	0	43	1	2	H7	29.31	100
ST2	1	na	na		0	0	51	1	3	G7	27.85	100
ST2	2	na	na		0	0	43	1	3	H7	27.96	100
ST3	1	na	na		0	0	44	1	1	G6	26.08	1000
ST3	2	na	na		0	0	42	1	1	H6	26.08	1000
ST3	1	na	na		0	0	44	1	2	G6	24.92	1000
ST3	2	na	na		0	0	42	1	2	H6	25.37	1000
ST3	1	na	na		0	0	44	1	3	G6	24.23	1000
ST3	2	na	na		0	0	42	1	3	H6	24.28	1000
ST4	1	na	na		0	0	37	1	1	G5	25.34	10000
ST4	2	na	na		0	0	41	1	1	H5	24.74	10000
ST4	1	na	na		0	0	37	1	2	G5	24.25	10000
ST4	2	na	na		0	0	41	1	2	H5	23.89	10000
ST4	1	na	na		0	0	37	1	3	G5	25.31	10000
ST4	2	na	na		0	0	41	1	3	H5	23.13	10000
ST5	1	na	na		0	0	30	1	1	G4	19.53	100000
ST5	2	na	na		0	0	40	1	1	H4	20.46	100000
ST5	1	na	na		0	0	30	1	2	G4	18.53	100000
ST5	2	na	na		0	0	40	1	2	H4	18.81	100000
ST5	1	na	na		0	0	30	1	3	G4	17.83	100000
ST5	2	na	na		0	0	40	1	3	H4	17.89	100000
ST6	1	na	na		0	0	23	1	1	G3	17.89	1000000
ST6	2	na	na		0	0	39	1	1	H3	17.1	1000000
ST6	1	na	na		0	0	23	1	2	G3	16.56	1000000
ST6	2	na	na		0	0	39	1	2	H3	16.25	1000000
ST6	1	na	na		0	0	23	1	3	G3	16.72	1000000
ST6	2	na	na		0	0	39	1	3	H3	15.48	1000000
ST7	1	na	na		0	0	16	1	1	G2	12.86	10000000
ST7	2	na	na		0	0	38	1	1	H2	12.96	10000000
ST7	1	na	na		0	0	16	1	2	G2	11.7	10000000
ST7	2	na	na		0	0	38	1	2	H2	11.82	10000000
ST7	1	na	na		0	0	16	1	3	G2	11.21	10000000
ST7	2	na	na		0	0	38	1	3	H2	11.45	10000000
ST8	1	na	na		0	0	59	1	1	G1	9.64	100000000
ST8	2	na	na		0	0	60	1	1	H1	8.9	100000000
ST8	1	na	na		0	0	59	1	2	G1	8.37	100000000
ST8	2	na	na		0	0	60	1	2	H1	7.68	100000000
ST8	1	na	na		0	0	59	1	3	G1	8.41	100000000
ST8	2	na	na		0	0	60	1	3	H1	6.8	100000000

## Sheet: Unknown_beetleguts
well_name	type	replicate	time	sex	beetleID	weight	length	tag	dilution_factor	plate	wellID	ct
T0.1	unknown	1	0	F	F4(T0)	0.22	29.2	2	5	1	A1	26.41
T0.1	unknown	2	0	F	F4(T0)	NA	NA	9	5	1	A2	26.09
T0.1	unknown	3	0	F	F4(T0)	NA	NA	17	5	1	A3	26.31
T0.2	unknown	1	0	F	F5(T0)	0.24	29.72	3	5	1	B1	27.31
T0.2	unknown	2	0	F	F5(T0)	NA	NA	10	5	1	B2	27.84
T0.2	unknown	3	0	F	F5(T0)	NA	NA	18	5	1	B3	27.3
T0.3	unknown	1	0	F	F6(T0)	0.24	27.3	4	5	1	C1	31.51
T0.3	unknown	2	0	F	F6(T0)	NA	NA	11	5	1	C2	32.4
T0.3	unknown	3	0	F	F6(T0)	NA	NA	19	5	1	C3	31.78
T0.6	unknown	1	0	M	M4(T0)	0.19	25.82	6	5	1	D1	26.1
T0.6	unknown	2	0	M	M4(T0)	NA	NA	12	5	1	D2	26.98
T0.6	unknown	3	0	M	M4(T0)	NA	NA	20	5	1	D3	26.48
T0.7	unknown	1	0	M	M5(T0)	0.26	27.36	7	5	1	E1	25.08
T0.7	unknown	2	0	M	M5(T0)	NA	NA	13	5	1	E2	25.39
T0.7	unknown	3	0	M	M5(T0)	NA	NA	21	5	1	E3	25.25
T0.8	unknown	1	0	M	M6(T0)	0.19	27.45	8	5	1	F1	26.93
T0.8	unknown	2	0	M	M6(T0)	NA	NA	15	5	1	F2	26.64
T0.8	unknown	3	0	M	M6(T0)	NA	NA	22	5	1	F3	25.94
T1.1	unknown	1	1	F	F1(T1)	0.16	25.08	24	5	1	A4	23.9
T1.1	unknown	2	1	F	F1(T1)	NA	NA	31	5	1	A5	24.57
T1.1	unknown	3	1	F	F1(T1)	NA	NA	38	5	1	A6	24.17
T1.2	unknown	1	1	F	F2(T1)	0.25	30.06	25	5	1	B4	25.89
T1.2	unknown	2	1	F	F2(T1)	NA	NA	32	5	1	B5	26.97
T1.2	unknown	3	1	F	F2(T1)	NA	NA	39	5	1	B6	25.73
T1.3	unknown	1	1	F	F3(T1)	0.44	34.07	26	5	1	C4	27.92
T1.3	unknown	2	1	F	F3(T1)	NA	NA	33	5	1	C5	28.27
T1.3	unknown	3	1	F	F3(T1)	NA	NA	40	5		C6	28.63
T1.6	unknown	1	1	M	M1(T1)	0.17	30.08	27	5	1	D4	25.25
T1.6	unknown	2	1	M	M1(T1)	NA	NA	34	5	1	D5	25.27
T1.6	unknown	3	1	M	M1(T1)	NA	NA	41	5	1	D6	24.73
T1.7	unknown	1	1	M	M2(T1)	0.15	30.02	28	5	1	E4	25.39
T1.7	unknown	2	1	M	M2(T1)	NA	NA	35	5	1	E5	25.81
T1.7	unknown	3	1	M	M2(T1)	NA	NA	42	5	1	E6	25.9
T1.8	unknown	1	1	M	M3(T1)	0.09	23.52	29	5	1	F4	25.51
T1.8	unknown	2	1	M	M3(T1)	NA	NA	36	5	1	F5	25.58
T1.8	unknown	3	1	M	M3(T1)	NA	NA	43	5	1	F6	25.66
T10.1	unknown	1	56	F	F1(T9)	0.1127	25.97	24	5	3	A4	35.21
T10.1	unknown	2	56	F	F1(T9)	NA	NA	31	5	3	A5	NA
T10.1	unknown	3	56	F	F1(T9)	NA	NA	38	5	3	A6	NA
T10.2	unknown	1	56	F	F2(T9)	0.1798	28.65	25	5	3	B4	NA
T10.2	unknown	2	56	F	F2(T9)	NA	NA	32	5	3	B5	NA
T10.2	unknown	3	56	F	F2(T9)	NA	NA	39	5	3	B6	NA
T10.3	unknown	1	56	F	F3(T9)	0.1414	22.5	26	5	3	C4	38.83
T10.3	unknown	2	56	F	F3(T9)	NA	NA	33	5	3	C5	NA
T10.3	unknown	3	56	F	F3(T9)	NA	NA	40	5	3	C6	NA
T10.6	unknown	1	56	M	M1(T9)	0.1047	25.31	27	5	3	D4	34.24
T10.6	unknown	2	56	M	M1(T9)	NA	NA	34	5	3	D5	33.62
T10.6	unknown	3	56	M	M1(T9)	NA	NA	41	5	3	D6	32.4
T10.7	unknown	1	56	M	M2(T9)	0.14	24.78	28	5	3	E4	NA
T10.7	unknown	2	56	M	M2(T9)	NA	NA	35	5	3	E5	NA
T10.7	unknown	3	56	M	M2(T9)	NA	NA	42	5	3	E6	31.33
T10.8	unknown	1	56	M	M3(T9)	0.1106	27.99	29	5	3	F4	36.04
T10.8	unknown	2	56	M	M3(T9)	NA	NA	36	5	3	F5	NA
T10.8	unknown	3	56	M	M3(T9)	NA	NA	43	5	3	F6	33.66
T2.1	unknown	1	2	F	F1(T2)	0.12	26.82	45	5	1	A7	25.54
T2.1	unknown	2	2	F	F1(T2)	NA	NA	52	5	1	A8	25.46
T2.1	unknown	3	2	F	F1(T2)	NA	NA	9	5	1	A9	25.84
T2.2	unknown	1	2	F	F2(T2)	0.13	26.87	46	5	1	B7	25.66
T2.2	unknown	2	2	F	F2(T2)	NA	NA	53	5	1	B8	25.68
T2.2	unknown	3	2	F	F2(T2)	NA	NA	10	5	1	B9	26.67
T2.3	unknown	1	2	F	F3(T2)	0.13	26.16	47	5	1	C7	25.42
T2.3	unknown	2	2	F	F3(T2)	NA	NA	54	5	1	C8	25.08
T2.3	unknown	3	2	F	F3(T2)	NA	NA	11	5	1	C9	25.72
T2.6	unknown	1	2	M	M1(T2)	0.158	28.35	48	5	1	D7	23.6
T2.6	unknown	2	2	M	M1(T2)	NA	NA	55	5	1	D8	22.99
T2.6	unknown	3	2	M	M1(T2)	NA	NA	12	5	1	D9	25.23
T2.7	unknown	1	2	M	M2(T2)	0.177	31.08	49	5	1	E7	24.54
T2.7	unknown	2	2	M	M2(T2)	NA	NA	56	5	1	E8	24.77
T2.7	unknown	3	2	M	M2(T2)	NA	NA	13	5	1	E9	25.49
T2.8	unknown	1	2	M	M3(T2)	0.14	26.43	50	5	1	F7	25.57
T2.8	unknown	2	2	M	M3(T2)	NA	NA	57	5	1	F8	25.14
T2.8	unknown	3	2	M	M3(T2)	NA	NA	15	5	1	F9	26.36
T3.1	unknown	1	4	F	F1(T3)	0.093	31.38	17	5	1	A10	28.02
T3.1	unknown	2	4	F	F1(T3)	NA	NA	24	5	1	A11	27.54
T3.1	unknown	3	4	F	F1(T3)	NA	NA	31	5	1	A12	28.32
T3.2	unknown	1	4	F	F2(T3)	0.203	27.7	18	5	1	B10	26.84
T3.2	unknown	2	4	F	F2(T3)	NA	NA	24	5	1	B11	26.52
T3.2	unknown	3	4	F	F2(T3)	NA	NA	32	5	1	B12	26.87
T3.3	unknown	1	4	F	F3(T3)	0.251	32.99	19	5	1	C10	30.7
T3.3	unknown	2	4	F	F3(T3)	NA	NA	26	5	1	C11	30.06
T3.3	unknown	3	4	F	F3(T3)	NA	NA	33	5	1	C12	30.74
T3.6	unknown	1	4	M	M1(T3)	0.154	27.48	20	5	1	D10	31.69
T3.6	unknown	2	4	M	M1(T3)	NA	NA	27	5	1	D11	31.5
T3.6	unknown	3	4	M	M1(T3)	NA	NA	34	5	1	D12	31.33
T3.7	unknown	1	4	M	M2(T3)	0.135	27.21	21	5	1	E10	29.7
T3.7	unknown	2	4	M	M2(T3)	NA	NA	28	5	1	E11	29.08
T3.7	unknown	3	4	M	M2(T3)	NA	NA	35	5	1	E12	29.27
T3.8	unknown	1	4	M	M3(T3)	0.194	33.01	22	5	1	F10	30.98
T3.8	unknown	2	4	M	M3(T3)	NA	NA	29	5	1	F11	31.65
T3.8	unknown	3	4	M	M3(T3)	NA	NA	36	5	1	F12	30.88
T4.1	unknown	1	6	F	F1(T4)		30.52	2	5	2	A1	26.9
T4.1	unknown	2	6	F	F1(T4)		30.52	9	5	2	A2	26.75
T4.1	unknown	3	6	F	F1(T4)		30.52	17	5	2	A3	27
T4.2	unknown	1	6	F	F2(T2)		26.5	3	5	2	B1	29.37
T4.2	unknown	2	6	F	F2(T2)		26.5	10	5	2	B2	29.75
T4.2	unknown	3	6	F	F2(T2)		26.5	18	5	2	B3	29.46
T4.3	unknown	1	6	F	F3(T4)		27.31	4	5	2	C1	36.84
T4.3	unknown	2	6	F	F3(T4)		27.31	11	5	2	C2	34.51
T4.3	unknown	3	6	F	F3(T4)		27.31	19	5	2	C3	35.7
T4.6	unknown	1	6	M	M1(T4)		31.55	6	5	2	D1	28.16
T4.6	unknown	2	6	M	M1(T4)		31.55	12	5	2	D2	28.84
T4.6	unknown	3	6	M	M1(T4)		31.55	20	5	2	D3	28.28
T4.7	unknown	1	6	M	M2(T4)		27.82	7	5	2	E1	35.7
T4.7	unknown	2	6	M	M2(T4)		27.82	13	5	2	E2	33.93
T4.7	unknown	3	6	M	M2(T4)		27.82	21	5	2	E3	36.2
T4.8	unknown	1	6	M	M3(T4)		30.22	8	5	2	F1	27.25
T4.8	unknown	2	6	M	M3(T4)		30.22	15	5	2	F2	26.6
T4.8	unknown	3	6	M	M3(T4)		30.22	22	5	2	F3	26.12
T5.1	unknown	1	9	F	F1(T5)		30.62	24	5	2	A4	36.08
T5.1	unknown	2	9	F	F1(T5)		30.62	31	5	2	A5	NA
T5.1	unknown	3	9	F	F1(T5)		30.62	38	5	2	A6	36.84
T5.2	unknown	1	9	F	F2(T5)		27.74	25	5	2	B4	NA
T5.2	unknown	2	9	F	F2(T5)		27.74	32	5	2	B5	NA
T5.2	unknown	3	9	F	F2(T5)		27.74	39	5	2	B6	NA
T5.3	unknown	1	9	F	F3(T5)		29.13	26	5	2	C4	NA
T5.3	unknown	2	9	F	F3(T5)		29.13	33	5	2	C5	38.53
T5.3	unknown	3	9	F	F3(T5)		29.13	40	5	2	C6	NA
T5.6	unknown	1	9	M	M1(T5)		30.14	27	5	2	D4	NA
T5.6	unknown	2	9	M	M1(T5)		30.14	34	5	2	D5	NA
T5.6	unknown	3	9	M	M1(T5)		30.14	41	5	2	D6	36.03
T5.7	unknown	1	9	M	M2(T5)		29.11	28	5	2	E4	30.1
T5.7	unknown	2	9	M	M2(T5)		29.11	35	5	2	E5	30.63
T5.7	unknown	3	9	M	M2(T5)		29.11	42	5	2	E6	30.32
T5.8	unknown	1	9	M	M3(T5)		30.29	29	5	2	F4	NA
T5.8	unknown	2	9	M	M3(T5)		30.29	36	5	2	F5	NA
T5.8	unknown	3	9	M	M3(T5)		30.29	43	5	2	F6	34.29
T6.1	unknown	1	12	F	F1(T6)		32.54	45	5	2	A7	37.56
T6.1	unknown	2	12	F	F1(T6)		32.54	52	5	2	A8	33.75
T6.1	unknown	3	12	F	F1(T6)		32.54	9	5	2	A9	36.15
T6.2	unknown	1	12	F	F2(T6)		30.54	46	5	2	B7	33.87
T6.2	unknown	2	12	F	F2(T6)		30.54	53	5	2	B8	35.21
T6.2	unknown	3	12	F	F2(T6)		30.54	10	5	2	B9	35.99
T6.3	unknown	1	12	F	F3(T6)		33.41	47	5	2	C7	32.97
T6.3	unknown	2	12	F	F3(T6)		33.41	54	5	2	C8	31.36
T6.3	unknown	3	12	F	F3(T6)		33.41	11	5	2	C9	33.02
T6.6	unknown	1	12	M	M1(T6)		28.92	48	5	2	D7	32.99
T6.6	unknown	2	12	M	M1(T6)		28.92	55	5	2	D8	32.3
T6.6	unknown	3	12	M	M1(T6)		28.92	12	5	2	D9	33.44
T6.7	unknown	1	12	M	M2(T6)		26.09	49	5	2	E7	35.08
T6.7	unknown	2	12	M	M2(T6)		26.09	56	5	2	E8	34.63
T6.7	unknown	3	12	M	M2(T6)		26.09	13	5	2	E9	34.41
T6.8	unknown	1	12	M	M3(T6)		27.41	50	5	2	F7	35.38
T6.8	unknown	2	12	M	M3(T6)		27.41	57	5	2	F8	34.6
T6.8	unknown	3	12	M	M3(T6)		27.41	15	5	2	F9	36.15
T8.1	unknown	1	24	F	F1(T7)	0.2132	31.26	17	5	2	A10	35.73
T8.1	unknown	2	24	F	F1(T7)	0.2132	31.26	24	5	2	A11	NA
T8.1	unknown	3	24	F	F1(T7)	0.2132	31.26	31	5	2	A12	NA
T8.2	unknown	1	24	F	F2(T7)	0.1813	27.2	18	5	2	B10	34.73
T8.2	unknown	2	24	F	F2(T7)	0.1813	27.2	24	5	2	B11	NA
T8.2	unknown	3	24	F	F2(T7)	0.1813	27.2	32	5	2	B12	NA
T8.3	unknown	1	24	F	F3(T7)	0.193	27.57	19	5	2	C10	38.27
T8.3	unknown	2	24	F	F3(T7)	0.193	27.57	26	5	2	C11	NA
T8.3	unknown	3	24	F	F3(T7)	0.193	27.57	33	5	2	C12	NA
T8.6	unknown	1	24	M	M1(T7)	0.196	31.71	20	5	2	D10	35.75
T8.6	unknown	2	24	M	M1(T7)	0.196	31.71	27	5	2	D11	NA
T8.6	unknown	3	24	M	M1(T7)	0.196	31.71	34	5	2	D12	NA
T8.7	unknown	1	24	M	M2(T7)	0.1649	26.72	21	5	2	E10	37.74
T8.7	unknown	2	24	M	M2(T7)	0.1649	26.72	28	5	2	E11	34.14
T8.7	unknown	3	24	M	M2(T7)	0.1649	26.72	35	5	2	E12	35.09
T8.8	unknown	1	24	M	M3(T7)	0.15	28.41	22	5	2	F10	36.26
T8.8	unknown	2	24	M	M3(T7)	0.15	28.41	29	5	2	F11	NA
T8.8	unknown	3	24	M	M3(T7)	0.15	28.41	36	5	2	F12	35.7
T9.1	unknown	1	48	F	F1(T8)	0.1701	31.37	2	5	3	A1	37.55
T9.1	unknown	2	48	F	F1(T8)	0.1701	31.37	9	5	3	A2	35.53
T9.1	unknown	3	48	F	F1(T8)	0.1701	31.37	17	5	3	A3	35.18
T9.2	unknown	1	48	F	F2(T8)	0.2195	32.74	3	5	3	B1	NA
T9.2	unknown	2	48	F	F2(T8)	0.2195	32.74	10	5	3	B2	38.73
T9.2	unknown	3	48	F	F2(T8)	0.2195	32.74	18	5	3	B3	34
T9.3	unknown	1	48	F	F3(T8)	0.2636	32.54	4	5	3	C1	NA
T9.3	unknown	2	48	F	F3(T8)	0.2636	32.54	11	5	3	C2	34.53
T9.3	unknown	3	48	F	F3(T8)	0.2636	32.54	19	5	3	C3	35.77
T9.6	unknown	1	48	M	M1(T8)	0.1573	28.27	6	5	3	D1	33.84
T9.6	unknown	2	48	M	M1(T8)	0.1573	28.27	12	5	3	D2	35.04
T9.6	unknown	3	48	M	M1(T8)	0.1573	28.27	20	5	3	D3	34.9
T9.7	unknown	1	48	M	M2(T8)	0.1871	29.77	7	5	3	E1	36.41
T9.7	unknown	2	48	M	M2(T8)	0.1871	29.77	13	5	3	E2	32.66
T9.7	unknown	3	48	M	M2(T8)	0.1871	29.77	21	5	3	E3	NA
T9.8	unknown	1	48	M	M3(T8)	0.2012	29.21	8	5	3	F1	35.31
T9.8	unknown	2	48	M	M3(T8)	0.2012	29.21	15	5	3	F2	35.09
T9.8	unknown	3	48	M	M3(T8)	0.2012	29.21	22	5	3	F3	36.37
